# Supplementary material for: Molecular Characterization of Diaporthe Species Associated With Hazelnut Defects
Source: Front Plant Sci. 2020 Dec 11;11:611655. doi: 10.3389/fpls.2020.611655 (PMC7759530; doi:10.3389/fpls.2020.611655)
Supplement: Supplementary Table 1 — List of strains used for the phylogenetic analyses with the corresponding ITS, EF1-α, and tub GenBank sequence accession numbers. The list includes a set of Diaporthe species selected from the literature and the 125 hazelnut strains amplified in this study. [file Table_1.XLSX]

## Sheet: References from literature
Supplementary Table 1. List of strains used for the phylogenetic analyses with the corresponding ITS, EF1-α, and tub GenBank sequence accession numbers. The list includes a set of Diaporthe species selected from the literature and the 125 hazelnut strains amplified in this study.
Species	Strain	Typification	NCBI accession codes			Notes
			ITS	tub	EF 1-α
Diaporthella corylina	CBS 121124	T	KC343004	KC343972	KC343730	Outgroup
Diaporthe acaciarum	CBS 138862	T	NR_137939	KP004509	N/A
Diaporthe acaciigena	CBS 129521	T	NR_137113	KC343973	KC343731
Diaporthe acericola	MFLUCC 17-0956	T	NR_152507	KY964074	KY964180
Diaporthe acerigena	CFCC 52554	T	NR_165873	N/A	MH121531
Diaporthe acerina	CBS 137.27		KC343006	KC343974	KC343732
Diaporthe acutispora	CGMCC 3.18285	T	NR_152466	KX999195	KX999155
Diaporthe alangii	CFCC 52556	T	NR_165874	MH121573	MH121533
Diaporthe alleghaniensis	CBS 495.72	T	NR_103696	KC343975	KC343733
Diaporthe alnea	CBS 146.46	T	NR_147525	KC343976	KC343734
Diaporthe amaranthophila	ATCC 74226	T	AF079776	N/A	N/A
Diaporthe ambigua	CBS 114015	T	NR_119434	KC343978	KC343736
Diaporthe ampelina	CBS 114016	T	NR_119433	JX275452	AY745056
Diaporthe amygdali	CBS 126679	T	NR_119753	KC343990	KC343748
Diaporthe anacardii	CBS 720.97	T	NR_111841	KC343992	KC343750
Diaporthe angelicae	CBS 111592	T	NR_119484	KC343995	KC343753
Diaporthe anhuiensis	CNUCC 201901	T	MN219718	MN227008	MN224668
Diaporthe apiculata	CGMCC 3.17533	T	KP267896	KP293476	KP267970
Diaporthe aquatica	IFRDCC 3051	T	JQ797437	N/A	N/A
Diaporthe arctii	CBS 139280	T	NR_147544	KJ610891	KJ590776
Diaporthe arecae	CBS 161.64	T	KC343032	KC344000	KC343758
Diaporthe arengae	CBS 114979	T	NR_111843	KC344002	KC343760
Diaporthe aseana	MFLUCC 12–0299a	T	NR_154920	KT459432	KT459448
Diaporthe asheicola	CBS 136967	T	KJ160562	KJ160518	KJ160594
Diaporthe aspalathi	CBS 117169	T	NR_165951	KC344004	KC343762
Diaporthe australafricana	CBS 113487	T	NR_165952	KC344007	KC343765
Diaporthe averrhoae	SCHM 3605		AY618930	N/A	N/A
Diaporthe baccae	CBS 136972	T	NR_152458	MF418509	KJ160597
Diaporthe batatas	CBS 122.21	T	NR_152456	KC344008	KC343766
Diaporthe beckhausii	CBS 138.27		KC343041	KC344009	KC343767
Diaporthe beilharziae	BRIP 54792	T	NR_137104	KF170921	JX862535
Diaporthe benedicti	BPI 893190	T	KM669929	N/A	KM669785
Diaporthe betulae	CFCC 50469	T	NR_147578	KT733020	KT733016
Diaporthe betulicola	CFCC 51128	T	NR_147593	KX024657	KX024655
Diaporthe betulina	CFCC 52562	T	MH121497	MH121579	MH121539
Diaporthe biconispora	CGMCC 3.17252	T	NR_158385	KJ490418	KJ490476
Diaporthe biguttulata	CGMCC 3.17248	T	NR_158384	KJ490403	KJ490461	Defined as synonym of D. eres in DOI: 10.1007/s11557-018-1395-4
Diaporthe bohemiae	CBS 143347	T	NR_164425	MG281188	MG281536
Diaporthe bougainvilleicola	SCHM 3006		AY601920	N/A	N/A
Diaporthe brasiliensis	CBS 133183	T	NR_111844	KC344010	KC343768
Diaporthe caatingaensis	CBS 141542	T	KY085927	KY115600	KY115603
Diaporthe camptothecae	SCHM 3611		AY622996	N/A	N/A
Diaporthe camptothecicola	CFCC 51632	T	KY203726	KY228893	KY228887	Defined as synonym of D. eres in DOI: 10.1007/s11557-018-1395-4
Diaporthe canthii	CBS 132533	T	NR_111758	KC843230	KC843120
Diaporthe carpini	CBS 114437		KC343044	KC344012	KC343770
Diaporthe caryae	CFCC 52563	T	NR_165875	MH121580	MH121540
Diaporthe cassines	CPC 21916	T	NR_137824	N/A	KF777244
Diaporthe castanea-mollissimae	DNP 128	T	JF957786	JX275438	JX275401
Diaporthe caulivora	CBS 127268	T	NR_111845	KC344013	KC343771
Diaporthe celastrina	CBS 139.27	T	NR_152457	KC344015	KC343773
Diaporthe celeris	CBS 143349	T	NR_158433	MG281190	MG281538
Diaporthe ceratozamiae	CBS 131306	T	JQ044420	N/A	N/A
Diaporthe cercidis	CFCC 52565	T	MH121500	MH121582	MH121542
Diaporthe cf. heveae 1	CBS 852.97		KC343116	KC344084	KC343842
Diaporthe cf. heveae 2	CBS 681.84		KC343117	KC344085	KC343843
Diaporthe chamaeropis	CBS 454.81	T	KC343048	KC344016	KC343774
Diaporthe charlesworthii	BRIP 54884m	T	NR_147538	KJ197268	KJ197250
Diaporthe chensiensis	CFCC 52567	T	NR_165876	MH121584	MH121544
Diaporthe chimonanthi	SCHM 3614		AY622993	N/A	N/A
Diaporthe cichorii	MFLUCC 17-1023	T	NR_152506	KY964104	KY964176
Diaporthe cinerascens	CBS 719.96		KC343050	KC344018	KC343776
Diaporthe cinnamoni	CFCC 52569	T	NR_165877	MH121586	MH121546
Diaporthe cissampeli	CBS 141331	T	NR_147594	KX228384	N/A
Diaporthe citri	CBS 135422	T	NR_145304	KC843187	KC843071
Diaporthe citriasiana	ZJUD 30	T	JQ954645	KC357459	JQ954663
Diaporthe citrichinensis	ZJUD34	T	JQ954648	MF418524	JQ954666
Diaporthe collariana	MFLU 17.2770	T	MG806115	MG783041	MG783040
Diaporthe columnaris	CBS 109873	T	AF439625	N/A	N/A
Diaporthe compacta	CGMCC 3.17536	T	KP267854	KP293434	KP267928
Diaporthe conica	CFCC 52571	T	NR_165878	MH121588	MH121548
Diaporthe convolvuli	CBS 124654	T	KC343054	KC344022	KC343780
Diaporthe cotoneastri	CBS 439.82	T	NR_119726	JX275437	GQ250341
Diaporthe crataegi	CBS 114435		KC343055	KC344023	KC343781
Diaporthe crotalariae	CBS 162.33	T	NR_103697	KC344024	KC343782
Diaporthe crousii	MUM 19.29	T	MK792311	MK837932	MK828081
Diaporthe cucurbitae	DAOM 42078	T	NR_147563	KP118848	KM453211
Diaporthe cuppatea	CBS 117499	T	NR_119491	KC344025	KC343783
Diaporthe cynaroidis	CBS 122676	T	NR_111846	KC344026	KC343784
Diaporthe cytosporella	FAU461	T	KC843307	KC843221	KC843116
Diaporthe daoigena	MFLUCC160097	T	KU557547	KU557571	KU557615
Diaporthe decedens	CBS 109772	T	KC343059	KC344027	KC343785
Diaporthe detrusa	CBS 109770	T	KC343061	KC344029	KC343787
Diaporthe diospyricola	CPC 21169	T	NR_137825	N/A	N/A
Diaporthe discoidispora	CGMCC 3.17255	T	NR_158386	KJ490445	KJ490503
Diaporthe dorycnii	MFLUCC 17-1015	T	NR_152505	KY964099	KY964171
Diaporthe elaeagni	CBS 504.72		KC343064	KC344032	KC343790
Diaporthe elaegni-glabrae	CGMCC 3.18287	T	NR_152468	KX999212	KX999171
Diaporthe ellipicola	CGMCC 3.17084	T	NR_147531	KF576294	KF576245	Defined as synonym of D. eres in DOI: 10.1007/s11557-018-1395-4
Diaporthe endophytica	CBS 133811	T	NR_111847	KC344033	KC343791
Diaporthe eres	CBS 138594	T	NR_144923	KJ420799	KJ210550
Diaporthe eucalyptorum	CBS 132525	T	NR_120157	N/A	N/A
Diaporthe eucommiicola	SCHM 3607		AY578071	N/A	N/A
Diaporthe eugeniae	CBS 444.82		KC343098	KC344066	KC343824
Diaporthe fibrosa	CBS 109751		KC343099	KC344067	KC343825
Diaporthe foeniculina	CBS 111553	T	NR_145303	KC344069	KC343827
Diaporthe fraxini-angustifoliae	BRIP 54781	T	NR_137103	KF170920	JX862534
Diaporthe fraxinicola	CFCC 52582	T	MH121517	N/A	MH121559
Diaporthe fukushii	MAFF 625034	T	JQ807469	N/A	JQ807418
Diaporthe fusicola	CGMCC 3.17087	T	NR_147532	KF576305	KF576256
Diaporthe ganjae	CBS 180.91	T	NR_120259	KC344080	KC343838
Diaporthe gardeniae	CBS 288.56		KC343113	KC344081	KC343839
Diaporthe garethjonesii	MFLUCC 12-0542A	T	NR_154921	KT459441	KT459457
Diaporthe glabrae	SCHM 3622		AY601918	N/A	N/A
Diaporthe goulteri	BRIP 55657a	T	NR_147540	KJ197270	KJ197252
Diaporthe gulyae	BRIP 54025	T	NR_111615	KJ197271	JN645803
Diaporthe helianthi	CBS 592.81	T	NR_103698	KC344083	KC343841
Diaporthe helicis	CBS 138596	T	KJ210538	KJ420828	KJ210559
Diaporthe heterophyllae	CBS 143769	T	MG600222	MG600226	MG600224
Diaporthe hickoriae	CBS 145.26	T	NR_103699	KC344086	KC343844
Diaporthe hispaniae	CPC 30321	T	MG281123	MG281296	MG281644
Diaporthe hongkongensis	CBS 115448	T	NR_111848	KC344087	KC343845
Diaporthe hordei	CBS 481.92		KC343120	KC344088	KC343846
Diaporthe huangshanensis	CNUCC 201903	T	MN219729	MN227010	MN224670
Diaporthe hungariae	CBS 143353	T	MG281126	MG281299	MG281647
Diaporthe impulsa	CBS 141.27	R	KC343122	KC344090	KC343848
Diaporthe incompleta	CGMCC 3.18288	T	NR_152471	KX999226	KX999186
Diaporthe inconspicua	CBS 133813	T	NR_111849	KC344091	KC343849
Diaporthe infecunda	CBS 133812	T	NR_111850	KC344094	KC343852
Diaporthe infertilis	CBS 199.39	T	KC343051	KC344019	KC343777
Diaporthe isoberliniae	CPC 22549	T	KJ869133	KJ869245	N/A
Diaporthe italiana	MFLUCC 18-0091	T	NR_165892	MH853689	MH853687
Diaporthe juglandicola	CFCC 51134	T	KU985101	KX024634	KX024628
Diaporthe juglandina	CBS 121004	T	NR_147526	KC344102	KC343860
Diaporthe kadsurae	CFCC 52586	T	MH121521	MH121600	MH121563
Diaporthe kochmanii	BRIP 54033	T	NR_111614	N/A	JN645809
Diaporthe kongii	BRIP 54031	T	NR_111616	KJ197272	JN645797
Diaporthe krabiensis	MFLUCC 17-2481	T	NR_166284	MN431495	MN433215
Diaporthe lagerstroemiae	SCHM 3608		AY622994	N/A	N/A
Diaporthe leptostromiformis	CBS 558.93		KC343244	KC344212	KC343970
Diaporthe leucospermi	CBS 111980	T	JN712460	KY435673	KY435632
Diaporthe limonicola	CPC 28200	T	NR_154980	MF418582	MF418501
Diaporthe liquidambaris	SCHM 3621		AY601919	N/A	N/A
Diaporthe litchicola	BRIP 54900	T	NR_147521	KF170925	JX862539
Diaporthe lithocarpi	CGMCC 3.15175	T	NR_147524	KF576311	KC153095
Diaporthe litoricola	MFLUCC 17-1657	T	NR_154979	N/A	N/A
Diaporthe longispora	CGMCC 3.17091	T	KF576267	KF576291	KF576242	Defined as synonym of D. eres in DOI: 10.1007/s11557-018-1395-4
Diaporthe longispora	CBS 194.36	T	KC343135	KC344103	KC343861
Diaporthe lonicerae	MFLUCC 17-0963	T	NR_152504	KY964073	KY964146
Diaporthe loropetali	SCHM 3615		AY601917	N/A	N/A
Diaporthe lusitanicae	CBS 123213	T	NR_119751	KC344105	KC343863
Diaporthe macintoshii	BRIP 55064a	T	NR_147539	KJ197269	KJ197251
Diaporthe magnoliicola	SCHM 3609		AY622995	N/A	N/A
Diaporthe mahothocarpus	CGMCC 3.15181	T	NR_147522	KF576312	KC153087	Defined as synonym of D. eres in DOI: 10.1007/s11557-018-1395-4
Diaporthe malorum	CAA734	T	NR_158411	KY435668	KY435627
Diaporthe manihotis	CBS 505.76	T	KC343138	KC344106	KC343864
Diaporthe marina	MFLU 17-2622	T	MN047102	N/A	N/A
Diaporthe maritima	DAOM 695742	T	NR_152463	KU574615	KU552023
Diaporthe masirevicii	BRIP 57892a	T	NR_147534	KJ197257	KJ197239
Diaporthe mayteni	CBS 133185	T	NR_111852	KC344107	KC343865
Diaporthe maytenicola	CPC 21896	T	NR_137826	KF777250	N/A
Diaporthe megalospora	CBS 143.27	T	KC343140	KC344108	KC343866
Diaporthe melitensis	CPC 27873	T	NR_154981	MF418584	MF418503
Diaporthe melonis	CBS 507.78	T	NR_103700	KC344110	KC343868
Diaporthe micheliae	SCHM 3603		AY620820	N/A	N/A
Diaporthe middletonii	BRIP 54884e	T	NR_147536	KJ197266	KJ197248
Diaporthe millettia	GUCC9167	T	MK398674	MK502089	MK480609
Diaporthe miriciae	BRIP 54736j	T	NR_147535	KJ197262	KJ197244
Diaporthe momicola	MFLUCC 16-0113	T	KU557563	KU557587	KU557631	Defined as synonym of D. eres in DOI: 10.1007/s11557-018-1395-4
Diaporthe multigutullata	CGMCC 3.17258	T	NR_158389	KJ490454	KJ490512
Diaporthe musigena	CBS 129519	T	NR_111853	KC344111	KC343869
Diaporthe myracrodruonis	URM 7972	T	NR_163320	MK205291	MK213408
Diaporthe neilliae	CBS 144.27	T	KC343144	KC344112	KC343870
Diaporthe neoarctii	CBS 109490	T	NR_111854	KC344113	KC343871
Diaporthe neoraonikayaporum	MFLUCC 14-1136	T	KU712449	KU743988	KU749369
Diaporthe nobilis	CBS 113470	T	KC343146	KC344114	KC343872
Diaporthe nomurai	CBS 157.29	T	KC343154	KC344122	KC343880
Diaporthe nothofagi	BRIP 54801	T	NR_137105	KF170922	JX862536
Diaporthe novem	CBS 127270	T	NR_111855	KC344124	KC343882
Diaporthe obtusifoliae	CPC 32336	T	NR_156395	N/A	N/A
Diaporthe ocoteae	CBS 141330	T	NR_147596	KX228388	N/A
Diaporthe oculi	HHUF 30565	T	NR_161018	LC373518	LC373516
Diaporthe oncostoma	CBS 589.78		KC343162	KC344130	KC343888
Diaporthe oraccini	CGMCC 3.17531	T	KP267863	KP293443	KP267937
Diaporthe osmanthi	GUCC9165	T	MK398675	MK502090	MK480610
Diaporthe ovalispora	CGMCC 3.17256	T	NR_158387	KJ490449	KJ490507
Diaporthe ovoidea	CGMCC 3.17092	T	NR_147530	KF576288	KF576239
Diaporthe oxe	CBS 133186	T	NR_111856	KC344132	KC343890
Diaporthe padi var. padi	CBS 114200		KC343169	KC344137	KC343895
Diaporthe padina	CFCC 52590	T	NR_165879	MH121604	MH121567
Diaporthe pandanicola	MFLU 18.0006	T	MG646974	MG646930	N/A
Diaporthe paranensis	CBS 133184	T	NR_111857	KC344139	KC343897
Diaporthe parapterocarpi	CPC 22729	T	KJ869138	KJ869248	N/A
Diaporthe pascoei	BRIP 54847	T	NR_137107	KF170924	JX862538
Diaporthe passiflorae	CBS 132527	T	NR_120155	KY435674	KY435633
Diaporthe passifloricola	CBS 141329	T	NR_147595	KX228387	N/A
Diaporthe penetriteum	CGMCC 3.17532	T	KP267879	KP293459	KP267953
Diaporthe perjuncta	CBS 109745	T	NR_147527	KC344140	KC343898
Diaporthe perniciosa	CBS 124030		KC343149	KC344117	KC343875
Diaporthe perseae	CBS 151.73	T	KC343173	KC344141	KC343899
Diaporthe pescicola	MFLU 16-0105	T	NR_154922	KU557579	KU557623
Diaporthe phaseolorum	AR4203	T	KJ590738	KJ610893	KJ590739
Diaporthe phillipsii	MUM 19.28	T	MK792305	MN000351	MK828076
Diaporthe phragmitis	CBS 138897	T	NR_137927	KP004507	N/A
Diaporthe phyllanthicola	SCHM 3680		AY620819	N/A	N/A
Diaporthe podocarpi-macrophylli	CGMCC 3.18281	T	NR_152467	KX999207	KX999167
Diaporthe potugallica	CBS 144228	T	MH063905	MH063917	MH063911
Diaporthe pseudoinconspicua	URM 7874	T	MH122538	MH122524	MH122533
Diaporthe pseudomangiferae	CBS 101339	T	NR_111858	KC344149	KC343907
Diaporthe pseudooculi	HHUF30617	T	NR_161019	LC373519	LC373517
Diaporthe pseudophoenicicola	CBS 462.69	T	NR_111859	KC344152	KC343910
Diaporthe pseudotsugae	MFLU 15-3228	T	KY964225	KY964108	KY964181
Diaporthe psoraleae	CBS 136412	T	NR_137126	KF777251	KF777245
Diaporthe psoraleae-pinnatae	CBS 136413	T	NR_137827	KF777252	N/A
Diaporthe pterocarpi	MFLUCC 10-0571	T	JQ619899	JX275460	JX275416
Diaporthe pterocarpicola	MFLUCC 10-0580a	T	NR_111713	JX275441	JX275403
Diaporthe pulla	CBS 338.89	T	KC343152	KC344120	KC343878
Diaporthe pustulata	CBS 109784		KC343187	KC344155	KC343913
Diaporthe pyracanthae	CBS 142384	T	NR_158410	KY435666	KY435625
Diaporthe racemosae	CBS 143770	T	MG600223	MG600227	MG600225
Diaporthe raonikayaporum	CBS 133182	T	NR_111860	KC344156	KC343914
Diaporthe ravennica	MFLUCC 15-0479	T	KU900335	KX432254	KX365197
Diaporthe rhoicola	CBS 129528	T	JF951146	KC843205	KC843100
Diaporthe rhoina	CBS 146.27		KC343189	KC344157	KC343915
Diaporthe rosae	MFLUCC 17-2658	T	MG828894	MG843878	N/A
Diaporthe rosicola	MFLU 17-0646	T	NR_157515	MG843877	MG829270
Diaporthe rossmaniae	MUM 19.30	T	MK792290	MK837914	MK828063
Diaporthe rostrata	CFCC 50062	T	NR_155054	KP208855	KP208853
Diaporthe rudis	CBS 109292	T	KC843331	KC843177	KC843090
Diaporthe rumicicola	MFLUCC 18-0739	T	MH846233	MK049555	MK049554
Diaporthe saccarata	CBS 116311	T	NR_120260	KC344158	KC343916
Diaporthe sackstonii	BRIP 54669b	T	NR_147537	KJ197267	KJ197249
Diaporthe salicicola	BRIP 54825	T	NR_137106	KF170923	JX862537
Diaporthe salinicola	MFLU 18-0553	T	MN047098	N/A	MN077073
Diaporthe sambucusii	CFCC 51986	T	KY852495	KY852511	KY852507
Diaporthe schini	CBS 133181	T	NR_111861	KC344159	KC343917
Diaporthe schisandrae	CFCC 51988	T	KY852497	KY852513	KY852509
Diaporthe schoeni	MFLU 15-1279	T	KY964226	KY964109	KY964182
Diaporthe sclerotioides	CBS 296.67	T	NR_111069	KC344161	KC343919
Diaporthe scobina	CBS 251.38	T	KC343195	KC344163	KC343921
Diaporthe sennae	CFCC 51636	T	NR_152499	KY228891	KY228885
Diaporthe sennicola	CFCC 51634	T	NR_152498	KY228889	KY228883
Diaporthe serafiniae	BRIP 55665a	T	KJ197274	KJ197254	KJ197236
Diaporthe shennongjiaensis	CNUCC 201905	T	MN216229	MN227012	MN224672
Diaporthe siamensis	MFLUCC10-573a	T	JQ619879	JX275429	JX275393
Diaporthe sojae	CBS 139282	T	NR_147542	KJ610875	KJ590762
Diaporthe sp. 1	CBS 134743		KJ160592	KJ160540	KJ160624
Diaporthe sp. 2	CGMCC 3.18291		KX986799	KX999231	KX999191
Diaporthe spartinicola	CPC 24951	T	NR_147572	KR857695	N/A
Diaporthe sterilis	CBS 136969	T	NR_152459	KJ160528	KJ160611
Diaporthe stewartii	CBS 193.36	T	NR_111417	JX275421	GQ250324
Diaporthe stictica	CBS 370.54	T	KC343212	KC344180	KC343938
Diaporthe subclavata	CGMCC 3.17257	T	NR_158388	KJ490451	KJ490509
Diaporthe subcylindrospora	MFLU 17-1195	T	MG746629	MG746631	MG746630
Diaporthe subellipicola	MFLU 17-1197	T	MG746632	MG746634	MG746633
Diaporthe subordinaria	CBS 464.90	T	KC343214	KC344182	KC343940
Diaporthe taoicola	MFLUCC 16-0117	T	NR_154923	KU557591	KU557635
Diaporthe tecomae	CBS 100547	T	KC343215	KC344183	KC343941
Diaporthe tectonae	MFLUCC 12-0777	T	NR_147590	KU743977	KU749359
Diaporthe tectonendophytica	MFLUCC 13-0471	T	NR_147591	KU743986	KU749367
Diaporthe tectonigena	MFLUCC 12-0767	T	NR_147589	KU743976	KU749371
Diaporthe terebinthifolii	CBS 133180	T	NR_111862	KC344184	KC343942
Diaporthe ternstroemiae	CGMCC 3.15183	T	NR_147523	N/A	KC153089
Diaporthe thunbergiae	MFLUCC 10-576a	T	NR_111714	JX275449	JX275409
Diaporthe thunbergiicola	MFLUCC 12-0033	T	KP715097	N/A	KP715098
Diaporthe tibetensis	CFCC 51999	T	MF279843	MF279873	MF279858
Diaporthe torilicola	MFLUCC 17-1051	T	KY964212	KY964096	KY964168
Diaporthe toxica	CBS 534.93	T	NR_120261	KC344188	KC343946
Diaporthe toxicodendri	TFM FP-10740	T	NR_158416	LC275224	LC275216
Diaporthe tulliensis	BRIP 62248a	T	NR_147574	KR936132	KR936133
Diaporthe ueckeri	CBS 139283	T	NR_147543	KJ610881	KJ590747
Diaporthe ukurunduensis	CFCC 52592	T	NR_165880	N/A	MH121569
Diaporthe undulata	CGMCC 3.18293	T	NR_152473	KX999230	KX999190
Diaporthe unshiuensis	ZJUD52	T	KJ490587	KJ490408	KJ490466
Diaporthe vaccinii	CBS 160.32	T	NR_103701	KC344196	KC343954
Diaporthe vacuae	MUM 19.31	T	MK792309	MK837931	MK828080
Diaporthe vangueriae	CPC 22703	T	KJ869137	KJ869247	N/A
Diaporthe vawdreyi	BRIP 57887a	T	NR_147573	KR936128	KR936129
Diaporthe velutina	CGMCC 3.18286	T	NR_152470	KX999223	KX999182
Diaporthe vexans	CBS 127.14		KC343229	KC344197	KC343955
Diaporthe viburni	CBS 158.29	T	MH855030	N/A	N/A
Diaporthe virgiliae	CMW 40755	T	KP247573	KP247582	N/A
Diaporthe viticola	CBS 113201	T	KC343234	KC344202	KC343960
Diaporthe vitimegaspora	CCRC 33533	T	AF230749	N/A	N/A
Diaporthe woolworthii	CBS 148.27		KC343245	KC344213	KC343971
Diaporthe xishuangbanica	CGMCC 3.18283	T	NR_152469	KX999217	KX999176
Diaporthe yunnanensis	CGMCC 3.18289	T	NR_152472	KX999228	KX999188
Phacidiopycnis tuberivora	CBS 268.32	T	NR_160066	N/A	N/A
Phomopsis conorum	CBS 587.79		KC343153	KC344121	KC343879
Phomopsis dauci	CBS 315.49	T	FJ889451	N/A	GQ250348
Phomopsis emicis	BRIP 45089a	T	JF957784	JX275458	JX275414
Phomopsis longicolla	ATCC 60325	T	NR_144924	KJ610883	KJ590767

## Sheet: Hazelnut strains
Strain	NCBI accession codes			Year of collection	Country of origin	Region of origin
	ITS	tub	EF 1-α
G.01	MT613733	MT849830	MT840703	2016	Georgia	Georgia
G.02	MT613734	MT849831	MT840704	2016	Georgia	Georgia
G.03	MT613735	MT849832	MT840705	2016	Georgia	Georgia
G.04	MT613736	MT849833	MT840706	2016	Georgia	Georgia
G.05	MT613737	MT849834	MT840707	2016	Georgia	Georgia
G.06	MT613738	MT849835	MT840708	2016	Georgia	Georgia
G.07	MT613739	MT849836	MT840709	2016	Georgia	Georgia
G.08	MT613740	MT849837	MT840710	2016	Georgia	Georgia
G.09	MT613741	MT849838	MT840711	2016	Georgia	Georgia
G.10	MT613742	MT849839	MT840712	2016	Georgia	Georgia
G.11	MT613743	MT849840	MT840713	2016	Georgia	Georgia
G.12	MT613744	MT849841	MT840714	2016	Georgia	Georgia
G.13	MT613745	MT849842	MT840715	2016	Georgia	Georgia
G.14	MT613746	MT849843	MT840716	2016	Georgia	Georgia
G.15	MT613747	MT849844	MT840717	2016	Georgia	Georgia
G.16	MT613748	MT849845	MT840718	2016	Georgia	Georgia
G.17	MT613749	MT849846	MT840719	2016	Georgia	Georgia
G.18	MT613750	MT849847	MT840720	2016	Georgia	Georgia
G.19	MT613751	MT849848	MT840721	2016	Georgia	Georgia
G.20	MT613752	MT849849	MT840722	2016	Georgia	Georgia
G.21	MT613753	MT849850	MT840723	2016	Georgia	Georgia
G.22	MT613754	MT849851	MT840724	2016	Georgia	Georgia
G.23	MT613755	MT849852	MT840725	2016	Georgia	Georgia
G.24	MT613756	MT849853	MT840726	2016	Georgia	Georgia
G.25	MT613757	MT849854	MT840727	2016	Georgia	Georgia
G.26	MT613758	MT849855	MT840728	2016	Georgia	Georgia
G.27	MT613759	MT849856	MT840729	2016	Georgia	Georgia
G.28	MT613760	MT849857	MT840730	2016	Georgia	Georgia
G.29	MT613761	MT849858	MT840731	2016	Georgia	Georgia
IT.01	MT613762	MT849859	MT840732	2017	Italy	Italy
IT.02	MT613763	MT849860	MT840733	2017	Italy	Italy
IT.03	MT613764	MT849861	MT840734	2017	Italy	Italy
IT.04	MT613765	MT849862	MT840735	2017	Italy	Italy
IT.05	MT613766	MT849863	MT840736	2017	Italy	Italy
IT.06	MT613767	MT849864	MT840737	2017	Italy	Italy
T.01	MT613768	MT849865	MT840738	2017	Turkey	Black sea
T.02	MT613769	MT849866	MT840739	2017	Turkey	Black sea
T.03	MT613770	MT849867	MT840740	2017	Turkey	Black sea
T.04	MT613771	MT849868	MT840741	2017	Turkey	Black sea
T.05	MT613772	MT849869	MT840742	2017	Turkey	Black sea
T.06	MT613773	MT849870	MT840743	2017	Turkey	Black sea
T.07	MT613774	MT849871	MT840744	2017	Turkey	Black sea
T.08	MT613775	MT849872	MT840745	2017	Turkey	Black sea
T.09	MT613776	MT849873	MT840746	2017	Turkey	Black sea
T.10	MT613777	MT849874	MT840747	2017	Turkey	Black sea
T.11	MT613778	MT849875	MT840748	2017	Turkey	Black sea
T.12	MT613779	MT849876	MT840749	2017	Turkey	Marmara
T.13	MT613780	MT849877	MT840750	2017	Turkey	Marmara
T.14	MT613781	MT849878	MT840751	2017	Turkey	Marmara
T.15	MT613782	MT849879	MT840752	2017	Turkey	Black sea
T.16	MT613783	MT849880	MT840753	2017	Turkey	Marmara
T.17	MT613784	MT849881	MT840754	2017	Turkey	Black sea
T.18	MT613785	MT849882	MT840755	2017	Turkey	Black sea
T.19	MT613786	MT849883	MT840756	2017	Turkey	Black sea
T.20	MT613787	MT849884	MT840757	2017	Turkey	Black sea
T.21	MT613788	MT849885	MT840758	2017	Turkey	Black sea
T.22	MT613789	MT849886	MT840759	2017	Turkey	Black sea
T.23	MT613790	MT849887	MT840760	2017	Turkey	Black sea
T.24	MT613791	MT849888	MT840761	2017	Turkey	Black sea
T.25	MT613792	MT849889	MT840762	2017	Turkey	Black sea
T.26	MT613793	MT849890	MT840763	2017	Turkey	Black sea
T.27	MT613794	MT849891	MT840764	2017	Turkey	Black sea
T.28	MT613795	MT849892	MT840765	2017	Turkey	Black sea
T.29	MT613796	MT849893	MT840766	2017	Turkey	Black sea
T.31	MT613797	MT849894	MT840767	2017	Turkey	Black sea
T.33	MT613798	MT849895	MT840768	2017	Turkey	Black sea
T.34	MT613799	MT849896	MT840769	2017	Turkey	Black sea
T.35	MT613800	MT849897	MT840770	2017	Turkey	Black sea
T.36	MT613801	MT849898	MT840771	2017	Turkey	Black sea
T.37	MT613802	MT849899	MT840772	2017	Turkey	Black sea
T.38	MT613803	MT849900	MT840773	2017	Turkey	Black sea
T.39	MT613804	MT849901	MT840774	2017	Turkey	Black sea
T.40	MT613805	MT849902	MT840775	2017	Turkey	Black sea
T.41	MT613806	MT849903	MT840776	2017	Turkey	Black sea
T.42	MT613807	MT849904	MT840777	2017	Turkey	Black sea
T.43	MT613808	MT849905	MT840778	2017	Turkey	Black sea
T.44	MT613809	MT849906	MT840779	2017	Turkey	Black sea
T.45	MT613810	MT849907	MT840780	2017	Turkey	Black sea
T.46	MT613811	MT849908	MT840781	2017	Turkey	Black sea
T.47	MT613812	MT849909	MT840782	2017	Turkey	Black sea
T.48	MT613813	MT849910	MT840783	2017	Turkey	Black sea
T.49	MT613814	MT849911	MT840784	2017	Turkey	Black sea
T.50	MT613815	MT849912	MT840785	2017	Turkey	Black sea
T.51	MT613816	MT849913	MT840786	2017	Turkey	Black sea
T.52	MT613817	MT849914	MT840787	2017	Turkey	Black sea
T.53	MT613818	MT849915	MT840788	2017	Turkey	Black sea
T.54	MT613819	MT849916	MT840789	2017	Turkey	Black sea
T.55	MT613820	MT849917	MT840790	2017	Turkey	Black sea
T.56	MT613821	MT849918	MT840791	2017	Turkey	Black sea
T.57	MT613822	MT849919	MT840792	2017	Turkey	Marmara
T.58	MT613823	MT849920	MT840793	2017	Turkey	Marmara
T.59	MT613824	MT849921	MT840794	2017	Turkey	Marmara
T.60	MT613825	MT849922	MT840795	2017	Turkey	Marmara
T.61	MT613826	MT849923	MT840796	2017	Turkey	Marmara
T.62	MT613827	MT849924	MT840797	2017	Turkey	Marmara
T.63	MT613828	MT849925	MT840798	2017	Turkey	Marmara
T.64	MT613829	MT849926	N/A	2017	Turkey	Marmara
T.65	MT613830	MT849927	MT840799	2017	Turkey	Marmara
T.66	MT613831	MT849928	MT840800	2017	Turkey	Marmara
T.67	MT613832	MT849929	MT840801	2017	Turkey	Marmara
T.68	MT613833	MT849930	MT840802	2017	Turkey	Marmara
T.69	MT613834	MT849931	MT840803	2017	Turkey	Marmara
T.70	MT613835	MT849932	MT840804	2017	Turkey	Marmara
T.71	MT613836	MT849933	MT840805	2017	Turkey	Marmara
T.72	MT613837	MT849934	MT840806	2017	Turkey	Marmara
T.73	MT613838	MT849935	MT840807	2017	Turkey	Marmara
T.74	MT613839	MT849936	MT840808	2017	Turkey	Marmara
T.75	MT613840	MT849937	MT840809	2017	Turkey	Marmara
T.76	MT613841	MT849938	MT840810	2017	Turkey	Marmara
T.77	MT613842	MT849939	MT840811	2017	Turkey	Marmara
T.78	MT613843	MT849940	MT840812	2017	Turkey	Marmara
T.79	MT613844	MT849941	MT840813	2017	Turkey	Black sea
T.80	MT613845	MT849942	MT840814	2017	Turkey	Black sea
T.81	MT613846	MT849943	N/A	2017	Turkey	Black sea
T.82	MT613847	MT849944	MT840815	2017	Turkey	Black sea
T.83	MT613848	MT849945	MT840816	2017	Turkey	Black sea
T.84	MT613849	MT849946	MT840817	2017	Turkey	Black sea
T.85	MT613850	MT849947	MT840818	2017	Turkey	Black sea
T.86	MT613851	MT849948	MT840819	2017	Turkey	Marmara
T.87	MT613852	MT849949	MT840820	2017	Turkey	Marmara
T.88	MT613853	MT849950	MT840821	2017	Turkey	Black sea
PH01	MT613854	MT849951	MT840822		Georgia
PH02	MT613855	MT849952	MT840823		Georgia
PH03	MT613856	MT849953	MT840824		Georgia
PH04	MT613857	MT849954	MT840825		Georgia
